# Supplementary material for: Retracted Article: Facile fabrication of water-dispersible AgInS2 quantum dots and mesoporous AgInS2 nanospheres with visible photoluminescence
Source: Royal Society of Chemistry journal article supplement (doi:10.1039/c5ra11545k), 2015-01-01
Supplement: c5ra11545k1.pdf [file c5ra11545k1.pdf]

## Facile fabrication of water-dispersible AgInS<sub>2</sub> quantum dots and mesoporous AgInS<sub>2</sub> nanospheres with visible photoluminescence

Hui Jin, Rijun Gui,\* Zonghua Wang,\* Jianfei Xia, Min Yang, Feifei Zhang and Sai Bi

*Collaborative Innovation Center for Marine Biomass Fiber, Laboratory of Fiber Materials and Modern Textiles, the Growing Base for State Key Laboratory, College of Chemical Science and Engineering, Shandong Sino-Japanese Center for Collaborative Research of Carbon Nanomaterials, Qingdao University, Shandong 266071, China. E-mail addresses: [guirijun@qdu.edu.cn](mailto:guirijun@qdu.edu.cn) (R. Gui); [wangzonghua@qdu.edu.cn](mailto:wangzonghua@qdu.edu.cn) (Z. Wang); Tel./fax: +86 532 85950873*

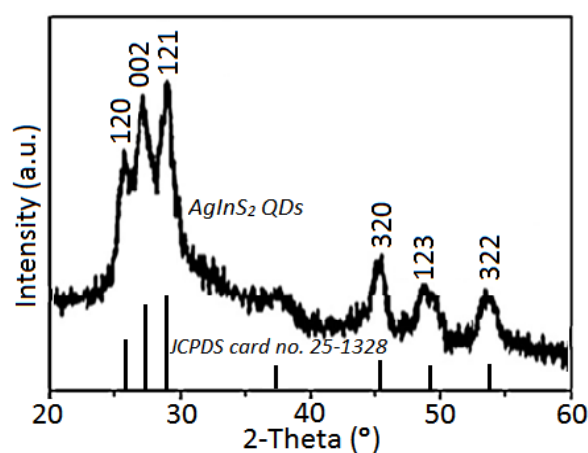

**Fig. S1** XRD patterns of the as-prepared AgInS<sub>2</sub> QDs.

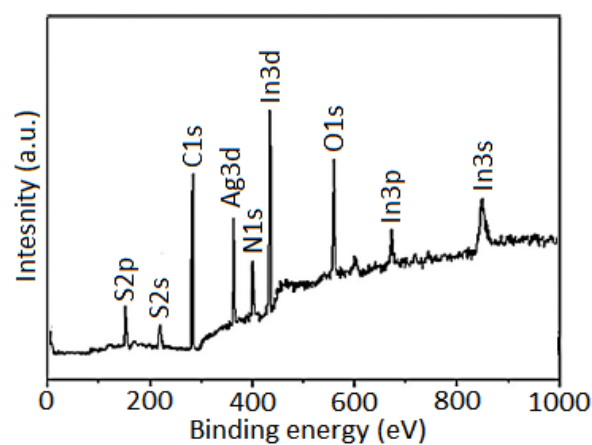

**Fig. S2** Full XPS spectrum of the as-prepared AgInS<sub>2</sub> QDs.

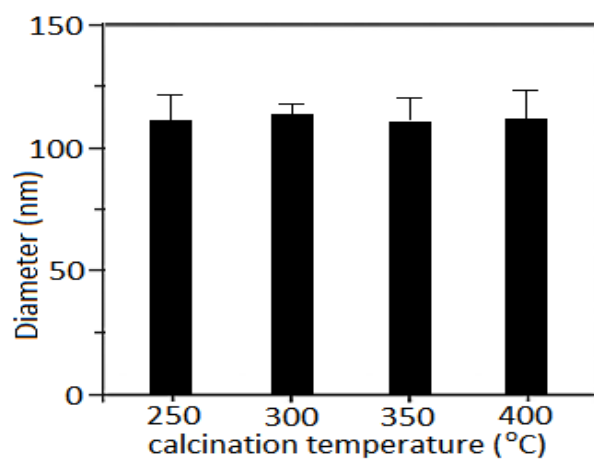

**Fig. S3** Average diameters of mesoporous AgInS<sub>2</sub> nanospheres obtained from 2 h of calcination treatment of AgInS<sub>2</sub> QDs-aggregates at different temperatures.

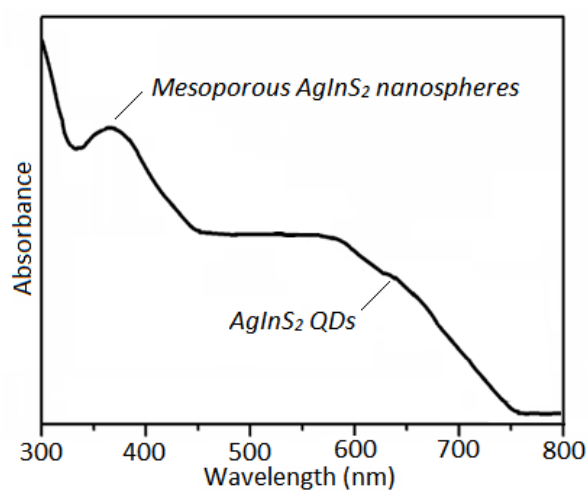

**Fig. S4** UV-vis-NIR absorption spectrum of the as-prepared mesoporous AgInS<sub>2</sub> nanospheres.
